# Supplementary material for: Mechanisms of Acquired BRAF Inhibitor Resistance in Melanoma: A Systematic Review
Source: PubMed Central journal article supplement (PMC7600801; doi:10.3390/cancers12102801), 2020-09-29
Supplement: cancers-12-02801-s001.pdf [file cancers-12-02801-s001.pdf]

# Supplementary Materials: Mechanisms of Acquired BRAF Inhibitor Resistance in Melanoma: A Systematic Review

Ilaria Proietti, Nevena Skroza, Nicoletta Bernardini, Ersilia Tolino, Veronica Balduzzi, Anna Marchesiello, Simone Michelini, Salvatore Volpe, Alessandra Mambrin, Giorgio Mangino, Giovanna Romeo, Patrizia Maddalena, Catherine Rees and Concetta Potenza

## Literature search protocols.

### (1) Genetics.

Database(s): Ovid MEDLINE(R) and Epub Ahead of Print, In-Process & Other Non-Indexed Citations and Daily 1946 to May 18, 2020

Search Strategy:

| #  | Searches                                                                                                                                                                                                                                                                                                                                                                                                                             | Results | Annotations  |
|----|--------------------------------------------------------------------------------------------------------------------------------------------------------------------------------------------------------------------------------------------------------------------------------------------------------------------------------------------------------------------------------------------------------------------------------------|---------|--------------|
| 1  | exp Melanoma/                                                                                                                                                                                                                                                                                                                                                                                                                        | 94173   |              |
| 2  | melanoma*.mp.                                                                                                                                                                                                                                                                                                                                                                                                                        | 133836  |              |
| 3  | 1 or 2                                                                                                                                                                                                                                                                                                                                                                                                                               | 134023  | Disease set  |
| 4  | ((BRAF* or "B-RAF*" or ""V600" or ""V600E*" or "V600K*" or "V600R*") and "inhibitor resistance").ti,ab,kw.                                                                                                                                                                                                                                                                                                                           | 148     |              |
| 5  | ((BRAF* or b-raf*) adj3 resistance*).ti,ab,kw.                                                                                                                                                                                                                                                                                                                                                                                       | 629     |              |
| 6  | 4 or 5                                                                                                                                                                                                                                                                                                                                                                                                                               | 668     | BRAFi        |
| 7  | exp DNA/ or exp Genetics/ or exp Sequence Analysis, DNA/                                                                                                                                                                                                                                                                                                                                                                             | 1103152 |              |
| 8  | ("deoxyribonucleic acid" or dna? or microRNA? or miRNA? or gene? or genom* or genotyp* or chromosome* or sequenc* or "polymerase chain reaction" or PCR).ti,ab,kw.                                                                                                                                                                                                                                                                   | 3743363 |              |
| 9  | ((("deoxyribonucleic acid" or dna? or microRNA? or miRNA? or gene? or genetic* or genom* or genotyp* or chromosome* or cell? or extraocell* or extra-cell* or molecular* or metabolic* or BRAF* or B-RAF* or MEK* or KRAS* or NRAS* or MAPK*) adj5 (resist* or mutat* or alterat* or amplificat* or deletion* or adapt* or switch* or inhibit* or plastic* or rewir* or differentiat* or de-differentiat* or proliferat*)).ti,ab,kw. | 1524726 |              |
| 10 | 7 or 8 or 9                                                                                                                                                                                                                                                                                                                                                                                                                          | 4622291 | Genetics set |
| 11 | 3 and 6 and 10                                                                                                                                                                                                                                                                                                                                                                                                                       | 524     |              |
| 12 | (case reports or clinical conference or congress or news or newspaper article or "review" or conference or meeting or abstract or presentation? or symposium?).pt.                                                                                                                                                                                                                                                                   | 4895193 |              |
| 13 | 11 not 12                                                                                                                                                                                                                                                                                                                                                                                                                            | 418     |              |
| 14 | limit 13 to yr="2010 -Current"                                                                                                                                                                                                                                                                                                                                                                                                       | 414     |              |
| 15 | limit 14 to "humans only (removes records about animals)"                                                                                                                                                                                                                                                                                                                                                                            | 408     |              |
| 16 | remove duplicates from 15                                                                                                                                                                                                                                                                                                                                                                                                            | 405     | Download set |

**(2) Epigenetics.**Database(s): **Ovid MEDLINE(R) and Epub Ahead of Print, In-Process & Other Non-Indexed Citations and Daily** 1946 to May 18, 2020

Search Strategy:

| #  | Searches                                                                                                                                                                                                                  | Results | Annotations                              |
|----|---------------------------------------------------------------------------------------------------------------------------------------------------------------------------------------------------------------------------|---------|------------------------------------------|
| 1  | exp Melanoma/                                                                                                                                                                                                             | 94173   |                                          |
| 2  | melanoma*.mp.                                                                                                                                                                                                             | 133836  |                                          |
| 3  | 1 or 2                                                                                                                                                                                                                    | 134023  | Disease set                              |
| 4  | ((BRAF* or "B-RAF*" or ""V600" or ""V600E*" or "V600K*" or "V600R*") and "inhibitor resistance").ti,ab,kw.                                                                                                                | 148     |                                          |
| 5  | ((BRAF* or b-raf*) adj3 resistance*).ti,ab,kw.                                                                                                                                                                            | 629     |                                          |
| 6  | 4 or 5                                                                                                                                                                                                                    | 668     | BRAF <sup>i</sup>                        |
| 7  | exp Epigenomics/ or exp Epigenesis, Genetic/                                                                                                                                                                              | 127602  |                                          |
| 8  | (epigenetic* or epi-genetic* or epigenomic* or epi-genomic* or epigenesis or epi-genesis or epimutation or epimutation).mp.                                                                                               | 92415   |                                          |
| 9  | DNA Methylation/ or exp transcription, genetic/ or exp transcriptome/ or exp Epithelial-Mesenchymal Transition/ or transcriptom*.ti,ab,kw. or ((methylation or histone or phenotype*) adj3 (modif* or change*)),ti,ab,kw. | 334967  |                                          |
| 10 | 7 or 8 or 9                                                                                                                                                                                                               | 463133  | Epigenetic or transcriptomic changes set |
| 11 | 3 and 6 and 10                                                                                                                                                                                                            | 53      |                                          |
| 12 | (case reports or clinical conference or congress or news or newspaper article or "review" or conference or meeting or abstract or presentation? or symposium?).pt.                                                        | 4895193 |                                          |
| 13 | 11 not 12                                                                                                                                                                                                                 | 47      |                                          |
| 14 | limit 13 to yr="2010 -Current"                                                                                                                                                                                            | 47      |                                          |
| 15 | limit 14 to "humans only (removes records about animals)"                                                                                                                                                                 | 46      |                                          |
| 16 | remove duplicates from 15                                                                                                                                                                                                 | 46      | Download set                             |

**(3) Immune system.**Database(s): **Ovid MEDLINE(R) and Epub Ahead of Print, In-Process & Other Non-Indexed Citations and Daily** 1946 to May 18, 2020

Search Strategy:

| #  | Searches                                                                                                                                                           | Results | Annotations       |
|----|--------------------------------------------------------------------------------------------------------------------------------------------------------------------|---------|-------------------|
| 1  | exp Melanoma/                                                                                                                                                      | 94173   |                   |
| 2  | melanoma*.mp.                                                                                                                                                      | 133836  |                   |
| 3  | 1 or 2                                                                                                                                                             | 134023  | Disease set       |
| 4  | ((BRAF* or "B-RAF*" or ""V600" or ""V600E*" or "V600K*" or "V600R*") and "inhibitor resistance").ti,ab,kw.                                                         | 148     |                   |
| 5  | ((BRAF* or b-raf*) adj3 resistance*).ti,ab,kw.                                                                                                                     | 629     |                   |
| 6  | 4 or 5                                                                                                                                                             | 668     | BRAF <sup>i</sup> |
| 7  | exp Immune System/                                                                                                                                                 | 1144069 |                   |
| 8  | (immune or immunity or "cell-mediated" or antibod* or antigen* or protect* or detect* or defense* or complement).ti,ab,kw.                                         | 4458764 |                   |
| 9  | 7 or 8                                                                                                                                                             | 5074871 | immune system set |
| 10 | 3 and 6 and 9                                                                                                                                                      | 117     |                   |
| 11 | (case reports or clinical conference or congress or news or newspaper article or "review" or conference or meeting or abstract or presentation? or symposium?).pt. | 4895193 |                   |
| 12 | 10 not 11                                                                                                                                                          | 87      |                   |
| 13 | limit 12 to yr="2010 -Current"                                                                                                                                     | 85      |                   |
| 14 | limit 13 to "humans only (removes records about animals)"                                                                                                          | 83      |                   |
| 15 | remove duplicates from 14                                                                                                                                          | 82      | Download set      |

**(4) Overcoming resistance.**Database(s): **Ovid MEDLINE(R) and Epub Ahead of Print, In-Process & Other Non-Indexed Citations and Daily** 1946 to May 18, 2020

Search Strategy:

| #  | Searches                                                                                                                                                                                                                                                                                            | Results | Annotations                                                             |
|----|-----------------------------------------------------------------------------------------------------------------------------------------------------------------------------------------------------------------------------------------------------------------------------------------------------|---------|-------------------------------------------------------------------------|
| 1  | exp Melanoma/                                                                                                                                                                                                                                                                                       | 94173   |                                                                         |
| 2  | melanoma*.mp.                                                                                                                                                                                                                                                                                       | 133836  |                                                                         |
| 3  | 1 or 2                                                                                                                                                                                                                                                                                              | 134023  | Disease set                                                             |
| 4  | ((BRAF* or "B-RAF*" or ""V600" or ""V600E"" or "V600K*" or "V600R*") and "inhibitor resistance").ti,ab,kw.                                                                                                                                                                                          | 148     |                                                                         |
| 5  | ((BRAF* or b-raf*) adj3 resistance*).ti,ab,kw.                                                                                                                                                                                                                                                      | 629     |                                                                         |
| 6  | ((overcom* or over-com*) adj1 resist*).ti,ab,kw.                                                                                                                                                                                                                                                    | 2876    |                                                                         |
| 7  | ("Mitogen-Activated Protein Kinase*" or MEK1* or MEK2*).ti,ab,kw.                                                                                                                                                                                                                                   | 52162   |                                                                         |
| 8  | ((Vemurafenib* or Zelboraf* or Dabrafenib* or Taffiner* or Tafinlar* or Tafinlar* or Encorafenib* or Braftovi*) and ("MEK inhibit*" or MAPK* or Cobimetinib* or Cotellic* or Trametinib* or Mecinist* or Mekinist* or Mekinisuto* or Binimetinib* or Balimek* or MEK-162 or MEK162 or Mektovi*).mp. | 1007    |                                                                         |
| 9  | (4 or 5) and (6 or 7)                                                                                                                                                                                                                                                                               | 155     |                                                                         |
| 10 | 3 and (8 or 9)                                                                                                                                                                                                                                                                                      | 892     | Melanoma disease set and ways to overcome resistance to BRAF inhibitors |
| 11 | (case reports or clinical conference or congress or news or newspaper article or "review" or conference or meeting or abstract or presentation? or symposium?).pt.                                                                                                                                  | 4895193 |                                                                         |
| 12 | 10 not 11                                                                                                                                                                                                                                                                                           | 510     |                                                                         |
| 13 | limit 12 to yr="2010 -Current"                                                                                                                                                                                                                                                                      | 509     |                                                                         |
| 14 | limit 13 to "humans only (removes records about animals)"                                                                                                                                                                                                                                           | 506     |                                                                         |
| 15 | remove duplicates from 14                                                                                                                                                                                                                                                                           | 499     | Download set                                                            |

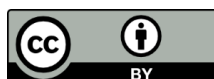

© 2020 by the authors. Licensee MDPI, Basel, Switzerland. This article is an open access article distributed under the terms and conditions of the Creative Commons Attribution (CC BY) license (<http://creativecommons.org/licenses/by/4.0/>).
